# Supplementary material for: Characterization of quinoxaline derivatives for protection against iatrogenically induced hearing loss
Source: PubMed Central journal article supplement (PMC8021103; doi:10.1172/jci.insight.141561), 2021-03-08
Supplement: jciinsight-6-141561-s213.pdf [file jciinsight-6-141561-s213.pdf]

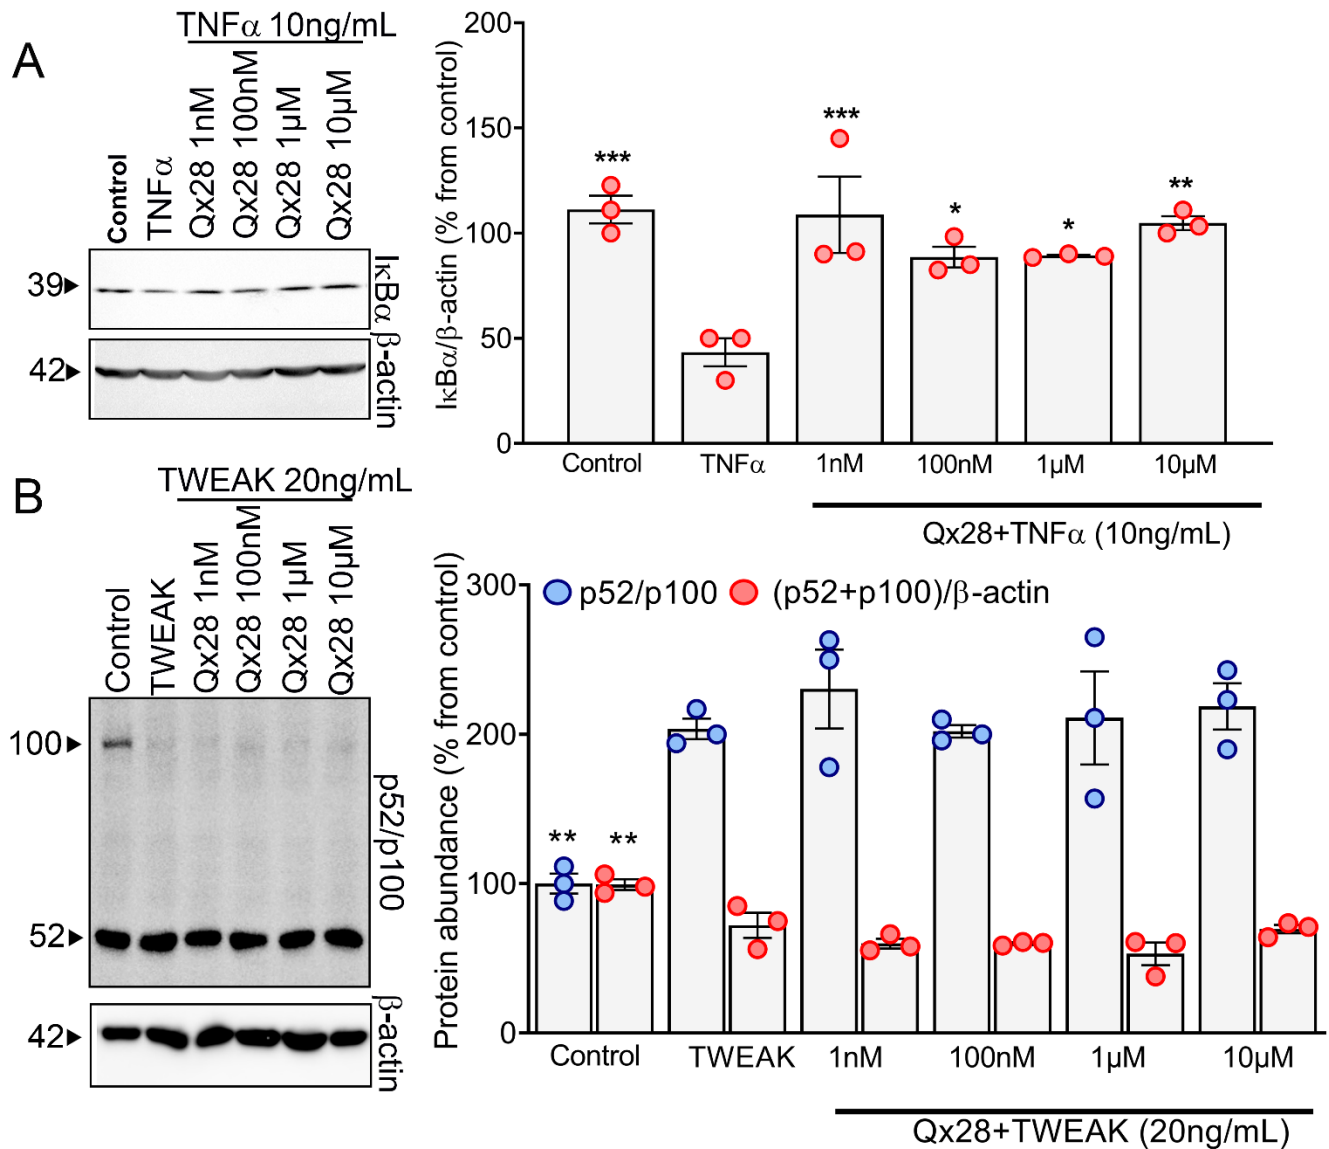

**Figure S1.** Qx28 inhibits TNF $\alpha$ -mediated activation of the NF- $\kappa$ B canonical pathway but has no effect on TWEAK-mediated activation of the NF- $\kappa$ B non-canonical pathway. **A:** Representative immunoblot and quantitative data for I $\kappa$ B $\alpha$ . MEFs were grown overnight in 1% FCS/DMEM, pre-incubated for 1-hour with media alone or Qx28, and then co-incubated for 30-min with TNF $\alpha$  (10ng/mL). **B:** Representative immunoblot and quantitative data for p52:p100 ratio and total p52/p100. MEFs were grown overnight in

1% FCS/DMEM, pre-incubated for 1-hour with media alone or Qx28, and then co-incubated for 4-hrs. with TWEAK (20ng/mL).

Membranes were stripped and re-probed for  $\beta$ -actin as a loading control. Quantification of the bands was performed using ImageJ (NIH). Results are expressed as mean  $\pm$  SEM from 3 independent experiments. Statistical analysis: One-way ANOVA with correction for Dunnett's multiple comparisons test. \* $P < 0.05$ ; \*\* $P < 0.01$ ; \*\*\* $P < 0.001$  versus  $\text{TNF}\alpha$  or TWEAK alone.

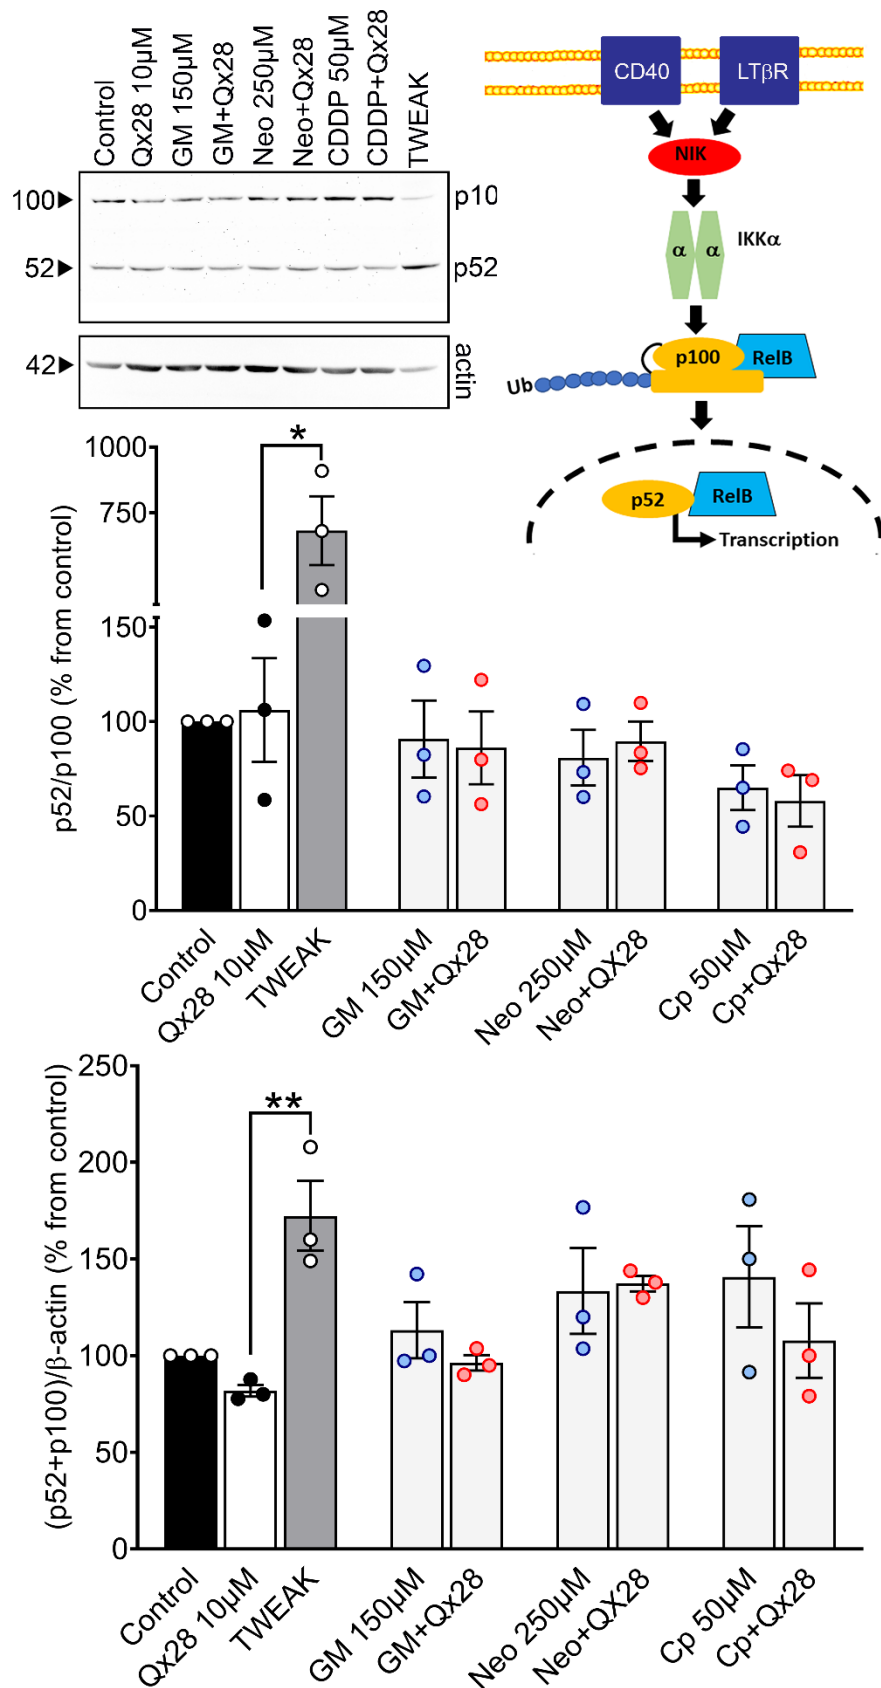

**Figure S2.** Aminoglycosides and CDDP are not involved in the activation of the NF-κB

*non-canonical pathway*. Representative immunoblot and quantitative data for p52:p100 ratio and total p52+p100. MEFs were incubated for 16-hours with the corresponding treatment in 1% FCS media and then processed for western blot analysis. Membranes were stripped and re-probed for  $\beta$ -actin as a loading control. TWEAK (20ng/mL) was used as a positive control for NF- $\kappa$ B non-canonical pathway activation. Quantification of the bands was performed using ImageJ (NIH). Results are expressed as mean  $\pm$  SEM from 3 independent experiments. Statistical analysis: Two-tailed Student's t test versus the corresponding ototoxin. \*P<0.05, \*\*P<0.01 Qx28 10 $\mu$ M versus TWEAK. Cartoon depicts some of the signaling molecules involved in the NF- $\kappa$ B non-canonical pathway.

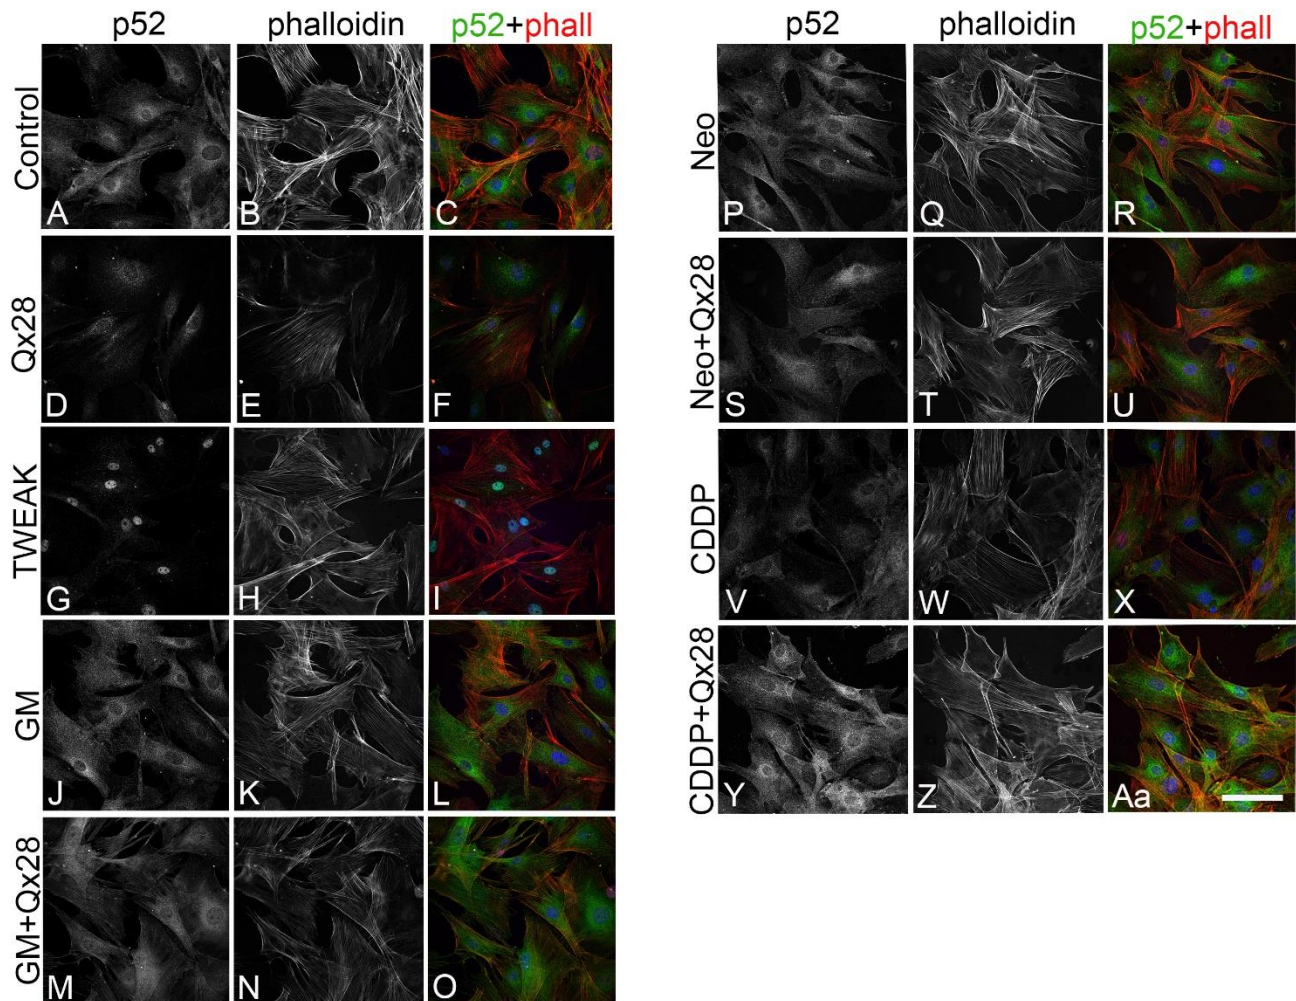

**Figure S3.** Aminoglycosides and CDDP have no effect on p52 subcellular localization. Representative images of MEFs incubated for 16-hours with 1% FCS media and the indicated treatment. **A-C:** media; **D-F:** Qx28 10 $\mu$ M; **G-I:** TWEAK 20ng/mL for 4-hours was used as a positive control for nuclear translocation; **J-L:** gentamicin (GM) 150 $\mu$ M, **M-O:** GM+Qx28; **P-R:** neomycin (Neo) 250 $\mu$ M; **S-U:** Neo+Qx28; **V-X:** CDDP 50 $\mu$ M; **Y-Aa:** CDDP +Qx28. Cells were fixed and immunostained for p52 (green) and counterstained with phalloidin (red). Representative images from 2 independent experiments. Scale bar = 55 $\mu$ m.

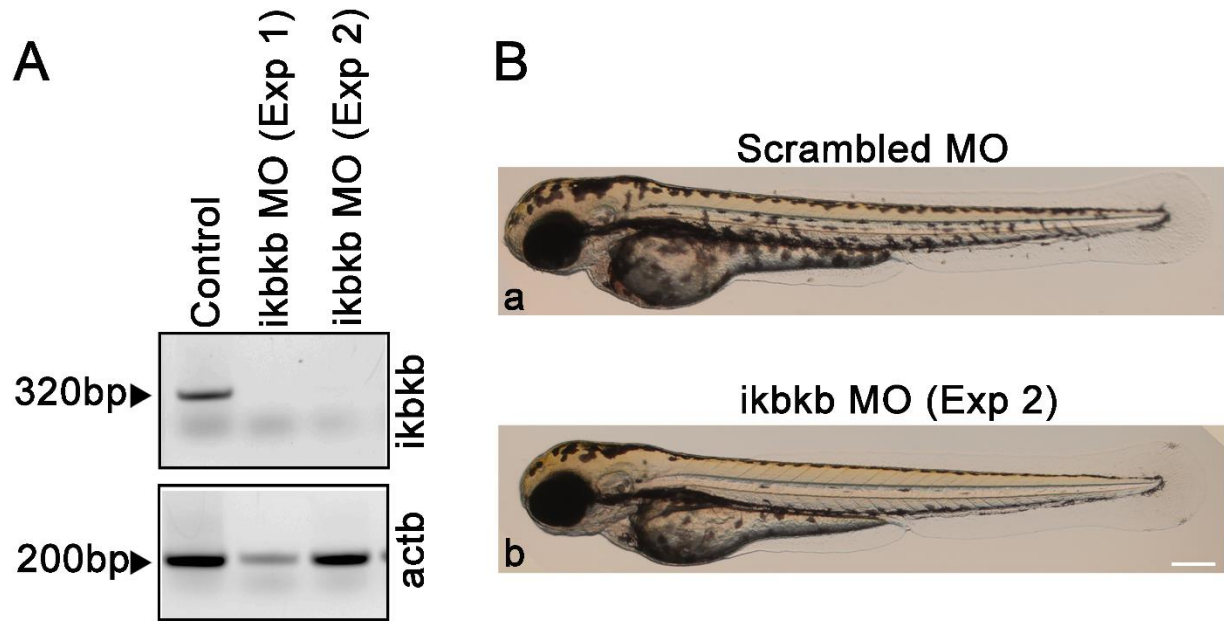

**Figure S4.** *ikbkb* morphants showed specific *ikbkb* knockdown and normal gross morphology. **A:** Four micrograms of RNA from controls (non-injected or scrambled) and *ikbkb* morphants (two independent experiments), were used in RT-PCR experiments using specific primers for *ikbkb* and *actb* (loading control). **B:** 3dpf scrambled (**a**) and *ikbkb* morphants (**b**). Scale bar: 200 $\mu$ m.

| <b>Compound ID</b> | <b>Substitution</b>                          | <b>Doses</b>           | <b>Compound ID</b> | <b>Substitution</b>                  | <b>Doses</b>      |
|--------------------|----------------------------------------------|------------------------|--------------------|--------------------------------------|-------------------|
| <b>Qx2</b>         | 2-NSO <sub>2</sub> PhNH <sub>2</sub> N<br>a* | 300μM,<br>1μM          | <b>Qx37</b>        | 6-CH <sub>2</sub> CO <sub>2</sub> Me | 300μM,<br>1μM     |
| <b>Qx3</b>         | 2,3,6-trimethyl                              | 300μM,<br>1μM          | <b>Qx38</b>        | 6-amine                              | 300μ,1μM,<br>10nM |
| <b>Qx4</b>         | 2-chloro                                     | 300μM                  | <b>Qx39</b>        | 2-carboxylic acid, 3-methyl          | 300μM             |
| <b>Qx5</b>         | 2-bromo                                      | 300μM,<br>1μM          | <b>Qx40</b>        | 2-hydroxy*                           | 300μM,<br>1μM     |
| <b>Qx6</b>         | 2-hydroxy, 7-chloro, 8-methoxy*              | 300μM                  | <b>Qx41</b>        | 2,3-dichloro                         | 300μM             |
| <b>Qx7</b>         | 2-methoxy, 7-bromo                           | 300μM                  | <b>Qx42</b>        | 5-methyl                             | 300μM,<br>1μM     |
| <b>Qx8</b>         | 2-chloro, 7-trifluoromethyl                  | 300μM                  | <b>Qx43</b>        | 2-CHO                                | 300μM,<br>1μM     |
| <b>Qx9</b>         | 2,3-dichloro, 6-methyl                       | 300μM                  | <b>Qx44</b>        | 2-amine, 7-bromo                     | 300μM,<br>1μM     |
| <b>Qx10</b>        | 2-chloro, 6-nitro                            | 300μM,<br>1μM,<br>10nM | <b>Qx45</b>        | 6-COCH <sub>3</sub>                  | 300μM,<br>1μM     |
| <b>Qx11</b>        | 2,3-dithiol, 6-methyl*                       | 300μM,<br>1μM,<br>10nM | <b>Qx46</b>        | 5-hydroxy*                           | 300μM,<br>1μM     |
| <b>Qx12</b>        | 2-carboxylic acid                            | 300μM,<br>1μM,<br>10nM | <b>Qx47</b>        | 6- CO <sub>2</sub> Et                | 300μM             |
| <b>Qx13</b>        | 2,3-dimethyl, 5-amine, 6-methoxy             | 300μM                  | <b>Qx48</b>        | 2,3-dimethyl, 6,7-dimethoxy          | 300μM,<br>1μM     |
| <b>Qx14</b>        | 2-chloro, 3-methoxy                          | 300μM                  | <b>Qx49</b>        | 2,3-dichloro, 6-trifluoromethoxy*    | 300μM             |
| <b>Qx15</b>        | 2,3-dichloro, 6-bromo                        | 300μM                  | <b>Qx50</b>        | 2,3-diamine                          | 300μM,<br>1μM     |
| <b>Qx16</b>        | 2-chloro, 7-bromo                            | 300μM                  | <b>Qx51</b>        | 5-fluoro, 7-bromo                    | 300μM,<br>1μM     |
| <b>Qx17</b>        | 2-chloro, 8-methoxy                          | 300μM                  | <b>Qx52</b>        | 2-NHSO <sub>2</sub> PhMe, 3-chloro*  | 300μM             |

|             |                                    |                        |             |                                         |                               |
|-------------|------------------------------------|------------------------|-------------|-----------------------------------------|-------------------------------|
| <b>Qx18</b> | 2,8-dichloro                       | 300µM,<br>1µM          | <b>Qx53</b> | 5-nitro                                 | 300µM                         |
| <b>Qx19</b> | 2-CO <sub>2</sub> Et, 3-chloro*    | 300µM                  | <b>Qx54</b> | 2-CO <sub>2</sub> Me*                   | 300µM                         |
| <b>Qx20</b> | 2-chloro, 7-methyl                 | 300µM,<br>1µM          | <b>Qx55</b> | 2-chloro, 6-fluoro                      | 300µM                         |
| <b>Qx21</b> | 2,3-dichloro, 6-methoxy            | 300µM,<br>1µM          | <b>Qx56</b> | 2,3-dichloro, 6,7-difluoro              | 300µM                         |
| <b>Qx22</b> | 2,6-dichloro                       | 300µM,<br>1µM          | <b>Qx57</b> | 5-chloro                                | 300µM                         |
| <b>Qx23</b> | 2,3-dimethoxy                      | 300µM,<br>1µM          | <b>Qx58</b> | 2-chloro, 6,7-dimethoxy                 | 300µM                         |
| <b>Qx24</b> | 6-2,4-thiazolidinedione            | 300µM                  | <b>Qx59</b> | 5-bromo                                 | 300µM                         |
| <b>Qx26</b> | 2-hydroxy, 6-bromo                 | 300µM,<br>1µM          | <b>Qx60</b> | 2-chloro, 6-trifluoromethyl             | 300µM                         |
| <b>Qx27</b> | 2-amine                            | 300µM,<br>1µM          | <b>Qx61</b> | 6-CH <sub>2</sub> OH                    | 300µM                         |
| <b>Qx28</b> | 5-carboxylic acid                  | 300µM,<br>1µM,<br>10nM | <b>Qx62</b> | 6-iodo                                  | 300µM                         |
| <b>Qx29</b> | 2,3-dichloro, 6-CO <sub>2</sub> Me | 300µM                  | <b>Qx63</b> | 6-BH <sub>2</sub> O <sub>2</sub> . HCl* | 300µM                         |
| <b>Qx30</b> | 2-chloro, 3-methyl                 | 300µM,<br>1µM          | <b>Qx64</b> | 5-bromo, 8-chloro                       | 300µM                         |
| <b>Qx31</b> | 6-hydroxy*                         | 300µM,<br>1µM          | <b>Qx65</b> | 2-chloro, 6-methoxy                     | 300µM                         |
| <b>Qx32</b> | 5-fluoro                           | 300µM                  | <b>Qx66</b> | 6-carboxylic acid                       | 300µM,<br>100µM,<br>50µM, 1µM |
| <b>Qx33</b> | 5-CO <sub>2</sub> Me               | 300µM,                 | <b>Qx67</b> | 5-bromo, 6-amine                        | 300µM                         |
| <b>Qx34</b> | 3-methyl, 5-carboxylic acid        | 300µM,<br>1µM          | <b>Qx68</b> | 6-methyl                                | 300µM                         |
| <b>Qx35</b> | 6-chloromethyl                     | 300µM,                 | <b>Qx69</b> | 2,5-dichloro                            | 300µM                         |
| <b>Qx36</b> | 2-carboxamide*                     | 300µM,<br>1µM          | <b>Qx70</b> | 6-bromo                                 | 300µM                         |



**Table S1.** Quinoxaline derivatives: Library of the quinoxaline derivatives tested in this paper including the functional group substitutions at the different positions of the quinoxaline ring. \* derivatives purchased from commercial sources.
